# Supplementary material
Source: PubMed Central journal article supplement (PMC3053969)
Supplement: 1011480108_pnas.201011480SI.pdf [file 1011480108_pnas.201011480SI.pdf]

# Supporting Information

Mallarino et al. 10.1073/pnas.1011480108

## SI Materials and Methods

**In Situ Hybridizations and Immunohistochemistry.** For immunohistochemistry, sections were blocked with 3% BSA in PBS containing 0.1% Triton-X 100 for 1 h, incubated overnight with primary antibody at 4 °C, washed in PBS, incubated for 1 h with secondary antibody, and washed with PBS. Immunostaining was performed using anti-*TGFβ1* (sc-400; Santa Cruz), anti-*TGFβ1*, -*β2*, -*β3* (sc-146, sc-90, sc-82, respectively; Santa Cruz), anti-*β-catenin* (610153; BD Transduction Laboratories), and anti-*Dkk3* (kindly provided by Dr. Christof Niehrs, German Research Cancer Center, Division of Molecular Embryology, Heidelberg, Germany). Antibodies were used at dilutions of 1:50–1:200. Reactions were visualized with Alexa dye conjugated secondary antibodies (Molecular Probes) at 1:500 dilution in 3% BSA/PBS/Triton-X 100. For controls, sections were incubated with PBS instead of primary antibodies but no specific cellular staining was observed.

**Alkaline Phosphatase.** Embryos were blocked with 3% BSA in PBS containing 0.1% Triton-X 100 for 1 h and incubated with an AP-conjugated secondary antibody (Jackson ImmunoResearch). The signal was detected using a combination of nitro blue tetrazolium and 5-bromo-4-chloro-3-indolyl phosphate to produce a purple precipitate.

**Quantitative Real-Time PCR (qRT-PCR).** Embryos were infected with the replication-competent retroviral vector (RCAS) RCAS::*Alk5\**, RCAS::*CA-β-catenin*, RCAS::*Dkk3*, RCAS::*Bmp4*, and RCAS::*CA-CamKII* constructs and total RNA was extracted from dissected upper beaks of day 11 (st. 33) individuals using an RNeasy kit (Qiagen). Five embryos ( $n = 5$ ) per construct were included in the analysis. RNA was treated with Turbo-DNase (Applied Biosystems) and cDNA was generated using the high-capacity RNA to cDNA kit (Applied Biosystems) and qRT-PCR was performed using the SYBR green protocol (Kapa Biosystems). Forty cycles of amplification were used and data acquisition was carried out with an Eppendorf Mastercycler. We designed specific primers to detect viral infection and all of the genes and skeletogenic markers used in this study (see *SI Materials and Methods* for primer sequences). All primers were designed to detect exclusively the chicken version of each of the genes. Gene expression was assayed in triplicate for each sample and normalized for GAPDH. Data from all qRT-PCR experiments were analyzed using the comparative CT method (1). All levels of expression are reported relative to wild-type (uninfected) embryos. Statistical significant of expression differences was established using a standard two-tailed Student's *t* test.

**Quantitative Real-Time PCR Primer Sequences.** (i) RCAS infection [RCAS-F1 (5'-TCGTTAGCGATGACAATGGA-3'), RCAS-R1 (5'-CACCGAACGTTGTTTGACTG-3')]; (ii) chicken *Bmp4* [*Bmp4*-F1 (5'-ACCATGAAGAGCACCTGGAGAG-3'), *Bmp4*-R1 (5'-TGCTGAGGTTGAAGACGAAGCG-3')]; (iii) chicken *Calmodulin* [*CaM*-F1 (5'-GGCAAGAAAATGAAAGATA-3'), *CaM*-R1 (5'-GACGAAGTTCTGCAGCACTA-3')]; (iv) chicken *Tgfβ1* [*Tgfβ1*-F1 (5'-AAGGCCTGGGAGAAGAA-TGT-3'), *Tgfβ1*-R1 (5'-GGTTGATGTTGTTGGCACAG-3')]; (v) chicken *β-catenin* [*β-catenin*-F1 (5'-AGGAAGCTGAAATG-GCTCAA-3'), *β-catenin*-R1 (5'-AGATTGCGAATCAACCCAAC-3')]; (vi) chicken *Dkk3* [*Dkk3*-F1 (5'-GCCCTGTAACCCAG-CATA-3'), *Dkk3*-R1 (5'-GAAGTGGCTTTCTGCACTC-3')]; (vii) *Collagen 2a1* [*Bmp4*-F1 (5'-AAGGGTGATCGTGGTG-

*AGAC-3'*), *Bmp4*-R1 (5'-TCGCCTCTGTCTCCTTGTGTTT-3')]; (viii) *Osteopontin* [*Opn*-F1 (5'-AGCCACCACACACACAGGTA-3'), *Opn*-R1 (5'-TGAAGCCAGGTCATTCTGTG-3')]; and (ix) *GAPDH* [*GAPDH*-F1 (5'-GAGGGTAGTGAAGGCTGCTG-3'), *GAPDH*-R1 (5'-CATCAAAGGTGGAGGAATGG-3')].

**RCAS Constructs.** The following plasmids were cloned into RCAS: a constitutively active form of the *TGFβ1* (*Alk-5*) (Addgene; plasmid 14833) (2), a dominant negative form of *TGFβ1* (Addgene; plasmid 1176) (3), and the entire coding region of the chicken *Dkk3* (gift of Dr. Christof Niehrs). RCAS::*CA-β-catenin*, RCAS::*Bmp4*, and RCAS::*CA-CamKII* constructs have been described previously (4–6).

**Micro-Computed Tomography (CT) scans.** Specimens were scanned using an X-Tek XRA-002 micro-CT imaging system set at 75 kV. Samples were mounted on a rotating table and a series of 3,142 projections of 2,000 × 2,000 pixels covering 360° was recorded. Volume and surface rendering was performed using AMIRA 5.0 (64-bit version; Mercury Computer Systems) for all specimens and the volume of the upper beak was extracted. As species differ in their body and head size, we calculated a multivariate indicator of overall size. To do so we used the log<sub>10</sub> transformed wing chord length, tarsus length, head length, head width, and head depth for each specimen as input into a factor analysis, which resulted in a single new factor hereafter referred to as “size.” Log<sub>10</sub> transformed beak volume was then regressed against size and unstandardized residuals were extracted for comparison.

**Quantification of Gene Expression Area.** Unprocessed raw images were converted into 8-bit format using the program ImageJ (7). The beak profiles were outlined manually to include only the mesenchymal region and exclude the epithelial portion of the tissue. The start of the beak was defined by a line perpendicular to the point where the esophagus region begins (downward curvature). This landmark could be easily identified in all species and stages analyzed, allowing us to have accurate comparisons. For each gene analyzed, a set threshold was chosen and the same value was applied to each of the images for the different species within that particular gene. ImageJ (7) was used to calculate the percentage of the beak where the genes of interest showed expression. Plotted values represent averages (and SD) from three individuals (see Fig. S2 for more details).

**Microarray Production and Use.** A DNA microarray (21,168 spots) was printed from a nonnormalized poly(A)-primed cDNA library made from RNA isolated from multiple (12 individuals) frontonasal processes of stage-26 and stage-29 embryos of the medium ground finch, *G. fortis* (8). We used Cy5-labeled probes made from individual frontonasal processes of the four derived species of *Geospiza* for direct comparisons against a common Cy3-labeled reference sample made from pooled RNA of several (9 individuals) embryos of more basal *G. difficilis*. In most cases we compared 4 unrelated individuals from each of the derived cactus finch and ground finch species (*G. scandens*, *G. conirostris*, *G. magnirostris*, and *G. fortis*) against the pooled common reference. RNA from each individual finch beak prominence was independently amplified and labeled in triplicate with a control dye swap. We used the two highest-quality sets of microarray data from each triplicate for clustering. Raw .gpr files were generated with GenePix 3.0 (Molecular Devices). Normalization and statistical analysis of the GPR data files were performed in

MatLab (Math Works). Data were normalized with the Lowess algorithm<sup>22</sup>. Only spots with a signal intensity exceeding the median background +2 SD were considered, which left 7,369 spots. The data were log<sub>2</sub> transformed.

**Microarray Cluster Analysis.** Clustering analysis and visualization were computed in MatLab. Agglomerative hierarchical clustering was performed by using the Euclidean distance measure: the average linkage and Ward heuristics were used to connect the gene clusters. For *k*-means clustering, the *k*-means algorithm partitioned the genes into *k*-discrete clusters on the basis of their expression. The number *k* (50) was preselected. The resultant tree illustrates that duplicates of the amplification/labeling experiments from the same individuals clustered together. Measurements of signal ratios and intensities for different transcripts were clustered to identify genes that were up-regulated or down-regulated in all individuals of a particular species compared with the basal *G. difficilis* reference.

1. Livak KJ, Schmittgen TD (2001) Analysis of relative gene expression data using real-time quantitative PCR and the 2(-Delta Delta C(T)) Method. *Methods* 25:402–408.
2. Feng XH, Derynck R (1996) Ligand-independent activation of transforming growth factor (TGF) beta signaling pathways by heteromeric cytoplasmic domains of TGF-beta receptors. *J Biol Chem* 271:13123–13129.
3. Wrana JL, et al. (1992) TGF beta signals through a heteromeric protein kinase receptor complex. *Cell* 71:1003–1014.
4. Duprez D, et al. (1996) Overexpression of BMP-2 and BMP-4 alters the size and shape of developing skeletal elements in the chick limb. *Mech Dev* 57:145–157.
5. Kengaku M, et al. (1998) Distinct WNT pathways regulating AER formation and dorsoventral polarity in the chick limb bud. *Science* 280:1274–1277.
6. Taschner MJ, Rafigh M, Lampert F, Schnaiter S, Hartmann C (2008) Ca<sup>2+</sup>/Calmodulin-dependent kinase II signaling causes skeletal overgrowth and premature chondrocyte maturation. *Dev Biol* 317:132–146.
7. Abramoff MD, Magelhaes PJ, Ram SJ (2004) Image Processing with ImageJ. *Biophotonics International* 11:36–42.
8. Abzhanov A, et al. (2006) The calmodulin pathway and evolution of elongated beak morphology in Darwin's finches. *Nature* 442:563–567.
9. Bowman RI (1961) *Morphological Differentiation and Adaptation in the Galápagos Finches* (Univ of California Press, Berkeley).
10. Grant PR, Abbott I, Schluter D, Curry RL, Abbott LK (1985) Variation in the size and shape of Darwin's finches. *Biol J Linn Soc* 25:1–39.

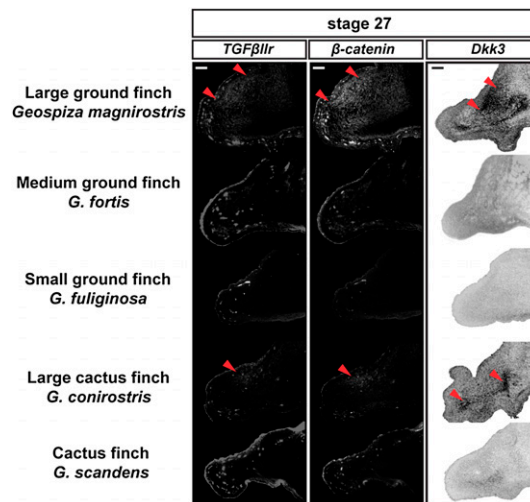

**Fig. S1.** Variation in the premaxillary bone (pmx) in *Geospiza* correlates with the expression of *TGFβ11r*, *β-catenin*, and *Dkk3*. In the large ground finch, the pmx condensation forms earlier (st. 27) than in the other species, showing a strong correlation with the time and place of expression of *TGFβ11r*, *β-catenin*, and *Dkk3*. Arrow colors indicate species that have comparable body sizes but differ in beak morphology. (Scale bar, 0.1 mm.) Images of skulls are from ref 9, with permission from the author. pmx, premaxillary bone; pnc, prenasal cartilage.

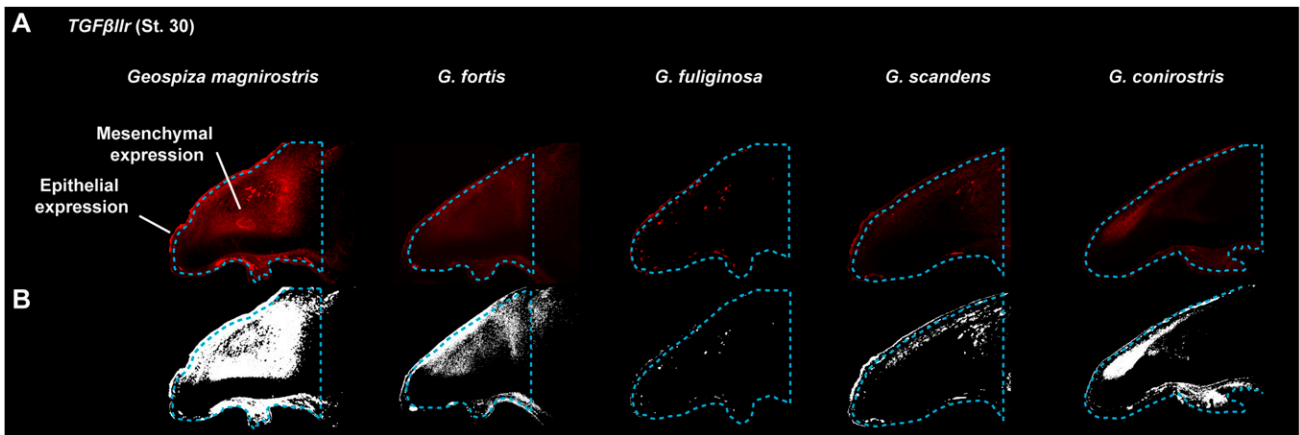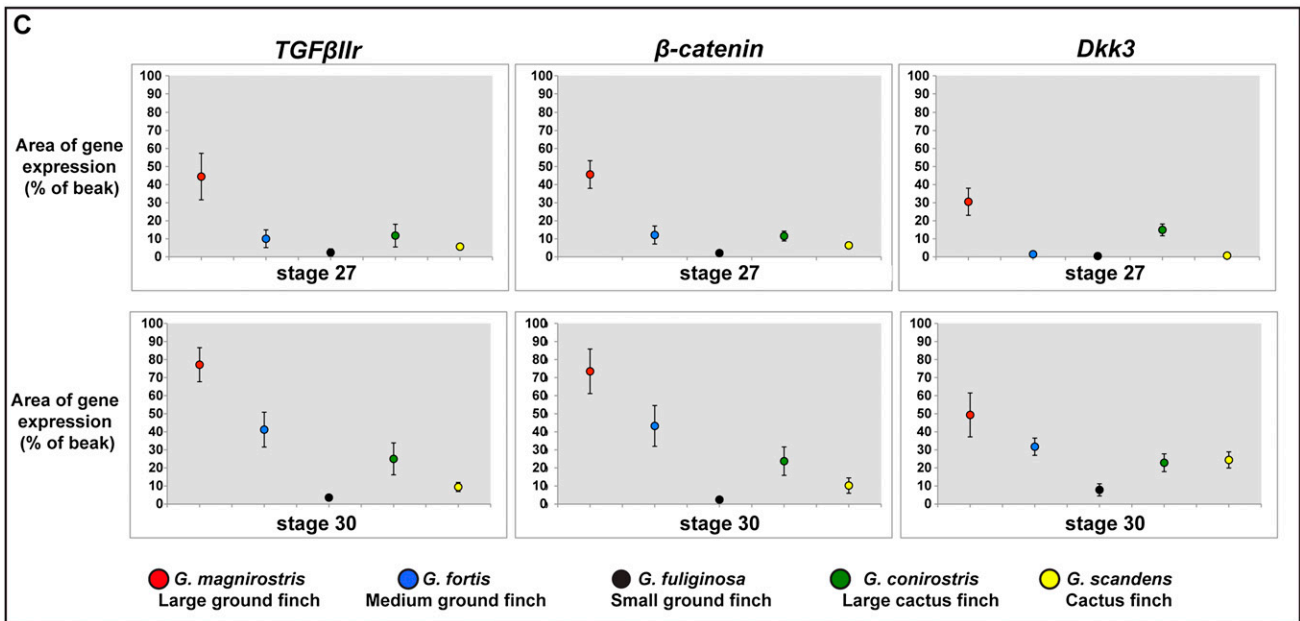

**Fig. S2.** Quantification of gene expression area. (A) Unprocessed raw images of *TGFβ1lr* expression in the different species of *Geospiza* analyzed. *TGFβ1lr* expression is used here to illustrate the methodology used in this analysis and the same procedure was followed for *β-catenin* and *Dkk3*. Because there is expression in both the beak mesenchyme and the epithelial tissue, beak profiles were outlined manually to include only the mesenchymal region and exclude the epithelial portion of the tissue (blue dashed line). The start of the beak was defined by a line perpendicular to the point where the esophagus region begins (downward curvature). (B) Images in 8-bit format were thresholded to the same set value. This value varied between genes but was kept constant for all of the images within a gene. (C) For each stage and gene analyzed, the percentage of the beak where the gene was expressed was calculated (error bars represent SD values).

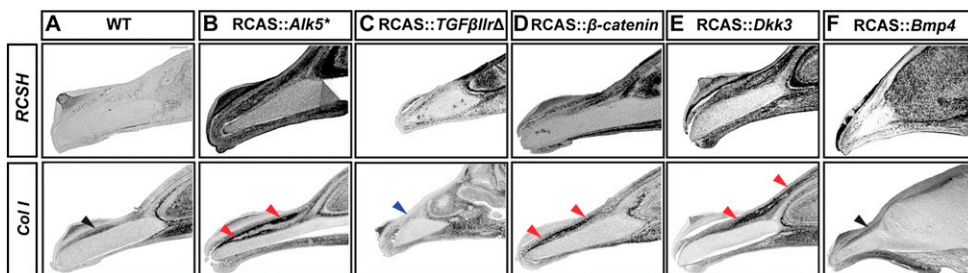

**Fig. S3.** Functional analysis of *TGFβ1lr*, *β-catenin*, and *Dkk3* in the chicken model system. (A–F) UV pictures of embryonic day 11 (HH st. 37). (A) Wild-type chicken embryos and embryos infected with (B) RCAS::*Alk5*<sup>\*</sup>, (C) RCAS::*TGFβ1lr*Δ, (D) RCAS::*CA-β-catenin*, (E) RCAS::*Dkk3*, and (F) RCAS::*Bmp4* constructs. We used the viral-specific probe RCSH and *Col I* probes to reveal RCAS infection (RCSH) and overall bone (*Col I*). Blue arrows indicate lower expression relative to wild-type specimens, red arrows indicate higher expression, and black arrows indicate no change. (Scale bar, 0.4 mm in sections A–F.)







**Table S1. Premaxillary bone volume of members of the genus *Geospiza* as determined with (micro) computed tomography (CT) scans**

| Species                      | Volume (mm <sup>3</sup> ) | Size corrected (residual) volume |
|------------------------------|---------------------------|----------------------------------|
| <i>Geospiza difficilis</i>   | 18.8                      | -0.378                           |
| <i>Geospiza fuliginosa</i>   | 34.2                      | 0.253                            |
| <i>Geospiza fortis</i>       | 112.0                     | 0.203                            |
| <i>Geospiza magnirostris</i> | 312.3                     | 0.234                            |
| <i>Geospiza conirostris</i>  | 78.66                     | -0.092                           |
| <i>Geospiza scandens</i>     | 49.3                      | -0.219                           |

As species differ in their body and head size, we calculated a multivariate indicator of overall size. To do so we used the log<sub>10</sub> transformed wing chord length, tarsus length, head length, head width, and head depth for each specimen as input into a factor analysis, which resulted in a single new factor hereafter referred to as "size." Log<sub>10</sub>-transformed beak volume was then regressed against size and unstandardized residuals were extracted for comparison.

**Table S2. Final cluster of ground finch-specific genes**

| No.       | Clone no.     | Clone identity from ground finch-specific cluster | Ground/cactus fold difference | Expression signal intensity |
|-----------|---------------|---------------------------------------------------|-------------------------------|-----------------------------|
| 1         | 0019H10       | Unknown                                           | 17.218                        | 5,062                       |
| 2         | 0041H10       | XDRP1(binds to cyclinA)                           | 18.007                        | 3,031                       |
| 3         | 0017D7        | Unknown                                           | 10.456                        | 2,698                       |
| 4         | 0071G4        | Proteasome subunit, alpha type 7                  | 18.735                        | 120                         |
| 5         | 0063C4        | Proteasome subunit, alpha type 5                  | 10.517                        | 10,494                      |
| 6         | 0055A4        | Unknown                                           | 20.533                        | 725                         |
| 7         | 0062B1        | 20S proteasome alpha 4 subunit                    | 19.063                        | 3,159                       |
| 8         | 0074 e10      | Ribosomal protein L23 (L17)                       | 16.043                        | 669                         |
| 9         | 0074G1        | Zinc finger protein 335                           | 15.952                        | 115                         |
| 10        | 0074G4        | Unknown                                           | 12.325                        | 5,136                       |
| 11        | 0014 E7       | Proteasome subunit, alpha type 7                  | 11.035                        | 4,868                       |
| 12        | 0096F11       | Similar to ribosomal protein L23                  | 16.757                        | 479                         |
| 13        | 0022A2        | Unknown                                           | 12.716                        | 8,490                       |
| 14        | 0051C9        | Unknown                                           | 8.801                         | 11,132                      |
| 15        | 0044F3        | Similar to ribosomal protein L23                  | 13.322                        | 170                         |
| 16        | 0044F6        | Unknown                                           | 14.222                        | 2,257                       |
| 17        | 0044F9        | Unknown                                           | 12                            | 6,513                       |
| <b>18</b> | <b>0181F7</b> | <b>TGF β receptor type II</b>                     | <b>10.333</b>                 | <b>7,698</b>                |
| 19        | 0181F10       | Unknown                                           | 9.25                          | 3,434                       |
| 20        | 0116B10       | Unknown                                           | 11.847                        | 1,013                       |
| 21        | 0212 E10      | Unknown                                           | 10.75                         | 3,710                       |
| 23        | 0137 E5       | Unknown                                           | 14.599                        | 741                         |
| 22        | 0154C10       | Ribosomal protein L23                             | 9.417                         | 1,020                       |
| <b>24</b> | <b>0164F2</b> | <b>Dickkopf-3 (DKK-3)</b>                         | <b>6.867</b>                  | <b>17,167</b>               |
| 25        | 0212F11       | Unknown                                           | 6.482                         | 6,915                       |
| 26        | 0178B2        | Ribosomal protein L23                             | 8.867                         | 1,705                       |
| 27        | 0118F5        | UNKNOWN                                           | 6.914                         | 43,115                      |
| 28        | 0178B5        | AMPK alpha-1 chain                                | 6.962                         | 10,243                      |
| 32        | 0118F8        | Unknown                                           | 3.003                         | 30,638                      |
| 30        | 0178B8        | Unknown                                           | 14.333                        | 6,138                       |
| 31        | 0130D8        | Unknown                                           | 4.818                         | 414                         |
| 32        | 0192 E5       | Ribosomal protein L23                             | 5.246                         | 192                         |
| 33        | 0192 E8       | Unknown                                           | 3.445                         | 2,408                       |
| 34        | 0120A8        | GTP-binding protein RAB1A                         | 3.336                         | 17,747                      |
| 35        | 0130G8        | Unknown                                           | 3.147                         | 3,168                       |
| 36        | 0127B3        | Ribosomal protein L23                             | 5.02                          | 1,220                       |
| 37        | 0190 E6       | Unknown                                           | 4.935                         | 31                          |
| 38        | 0190 E9       | Ribosomal protein L18a                            | 8.821                         | 15,683                      |
| 39        | 0097F1        | Unknown                                           | 14.273                        | 8,729                       |
| 40        | 0107B11       | Ribosomal protein S11                             | 10.5                          | 4,165                       |
| 41        | 0029B8        | TRAM-1                                            | 27.5                          | 4,238                       |

Table S2. Cont.

| No.       | Clone no.      | Clone identity from ground finch-specific cluster | Ground/cactus fold difference | Expression signal intensity |
|-----------|----------------|---------------------------------------------------|-------------------------------|-----------------------------|
| 42        | 0025D5         | Unknown                                           | 8.729                         | 11,636                      |
| 43        | 0064B5         | Unknown                                           | 35.667                        | 14,487                      |
| 44        | 0006D2         | Unknown                                           | 7.124                         | 14,169                      |
| 45        | 0147B1         | Unknown                                           | 8.212                         | 5,862                       |
| 46        | 0195H1         | Nucleoside diphosphate kinase                     | 8.756                         | 3,461                       |
| 47        | 0157H4         | 40S ribosomal protein S3                          | 10.771                        | 2,911                       |
| 48        | 0149D4         | Nucleoside diphosphate kinase                     | 4.407                         | 16,107                      |
| 49        | 0187 E1        | Histone H3, embryonic                             | 9.008                         | 5,257                       |
| 50        | 0187 E4        | Unknown                                           | 12.444                        | 862                         |
| 51        | 0187 E7        | Alpha-cardiac actin                               | 9.177                         | 309                         |
| 52        | 0143 E7        | Unknown                                           | 4.694                         | 750                         |
| 53        | 0125G7         | Nucleoside diphosphate kinase                     | 3.533                         | 15,443                      |
| 54        | 0185C10        | 40S ribosomal protein S21                         | 3.992                         | 19,207                      |
| 55        | 0185 E1        | Unknown                                           | 3.233                         | 6,434                       |
| 56        | 0129A4         | XP_237708                                         | 5.051                         | 4,125                       |
| 57        | 0185 E4        | Unknown                                           | 8.797                         | 3,637                       |
| 58        | 0129A7         | Translation initiation factor 3, subunit 3        | 9.234                         | 1,056                       |
| 59        | 0181C4         | Unknown                                           | 7                             | 8,291                       |
| 60        | 0129A10        | Unknown                                           | 11.746                        | 340                         |
| 61        | 0193 E7        | Unknown                                           | 10.39                         | 2,866                       |
| 62        | 0152B10        | TRAM-1                                            | 12.627                        | 221                         |
| 63        | 0204D10        | Nucleoside diphosphate kinase                     | 12.15                         | 69                          |
| 64        | 0152F4         | Ribosomal protein S11                             | 7.622                         | 5,223                       |
| <b>65</b> | <b>0132F10</b> | <b>Beta-catenin (<math>\beta</math>-catenin)</b>  | <b>4.281</b>                  | <b>7,478</b>                |
| 66        | 0194D7         | Unknown                                           | 18.6                          | 88                          |
| 67        | 0212 E4        | ETS-family transcription factor EHF               | 7.353                         | 32,394                      |
| 68        | 0144 E7        | Unknown                                           | 5.8                           | 24,120                      |
| 69        | 0162 E1        | Peptide elongation factor 1-beta                  | 14.254                        | 11,288                      |
| 70        | 0162 E10       | Ribosomal protein S11                             | 11.143                        | 1,472                       |
| 71        | 0210G1         | Unknown                                           | 19.5                          | 8                           |
| 72        | 0159H8         | Diphosphate kinase                                | 6.03                          | 17,609                      |
| 73        | 0179B2         | Unknown                                           | 9.464                         | 2,699                       |
| 74        | 0179B8         | Unknown                                           | 8.985                         | 16,087                      |
| 75        | 0167F5         | Ribosomal protein L35a                            | 16.25                         | 3,353                       |
| <b>76</b> | <b>0211F8</b>  | <b>Coll Ia2 precursor (osteoblast marker)</b>     | <b>7.476</b>                  | <b>6,305</b>                |
| 77        | 0165B2         | Unknown                                           | 6.32                          | 13,504                      |
| 78        | 0113H8         | Peptide elongation factor 1-beta                  | 6.107                         | 12,298                      |
| 79        | 0189D5         | Unknown                                           | 18.212                        | 888                         |
| 80        | 0189D8         | Unknown                                           | 9.756                         | 1,332                       |
| 81        | 0189D11        | Unknown                                           | 10.771                        | 8,132                       |
| 82        | 0153D2         | 40S ribosomal protein S21                         | 10.407                        | 2,503                       |
| 83        | 0131C2         | Ribosomal protein S11                             | 16.008                        | 294                         |
| 84        | 0173A5         | Ribosomal protein S21                             | 4.444                         | 5,063                       |
| 85        | 0173A8         | Unknown                                           | 9.177                         | 867                         |
| 86        | 0125 E8        | Unknown                                           | 4.694                         | 8,341                       |
| 87        | 0125 E11       | Unknown                                           | 5.533                         | 1,243                       |
| 88        | 0125G2         | Unknown                                           | 3.992                         | 12,755                      |
| 89        | 0208B11        | GALECTIN-1                                        | 3.233                         | 8,937                       |
| 90        | 0110H8         | Unknown                                           | 3.051                         | 8,754                       |
| 91        | 0194H11        | Unknown                                           | 4.639                         | 8,246                       |
| 92        | 0130D11        | Unknown                                           | 5.961                         | 5,217                       |
| 93        | 0114F5         | Unknown                                           | 7.908                         | 956                         |
| 94        | 0200A11        | Peptide elongation factor 1- $\beta$              | 5.904                         | 167                         |
| 95        | 0188G5         | Unknown                                           | 6.343                         | 2,300                       |
| 96        | 0188G8         | Unknown                                           | 6.294                         | 20,844                      |
| 97        | 0097F1         | Unknown                                           | 6.086                         | 7,969                       |
| 98        | 0107B11        | Ribosomal protein S11                             | 5.269                         | 4,445                       |
| 99        | 0029B8         | TRAM-1                                            | 4.25                          | 7,394                       |
| 100       | 0025D5         | Unknown                                           | 3.492                         | 8,638                       |

Both the clone number as found in the library as well as the identity as revealed by sequencing and BLAST search analysis are shown. The table shows a cluster, which showed candidates with both high median-fold difference in expression between ground and cactus finches and overall expression (signal) level. The three genes examined here, *TGF $\beta$ IIIr* (no. 18), *Dkk3* (no. 24), and  $\beta$ -catenin (no. 65), are highlighted in bold. Also, note that the array revealed an important early bone marker, alpha-2 type I collagen precursor (*Coll Ia*) (no. 76), also highlighted in bold.
